# Supplementary material
Source: PubMed Central journal article supplement (PMC3454500)
Supplement: NIHMS404440-supplement-Supp_Info.pdf [file NIHMS404440-supplement-Supp_Info.pdf]

## Supporting Information

### Isolation of DNA Aptamers Using Micro Free Flow Electrophoresis

Meng Jing and Michael T. Bowser\*

Department of Chemistry, University of Minnesota, 207 Pleasant Street SE, Minneapolis, Minnesota  
55455, United States

Email: [bowser@umn.edu](mailto:bowser@umn.edu)

#### Aptamer Sequences

Sequences obtained from cloning and Sanger sequencing are listed below. 23 sequences were obtained from round 1, 28 sequences were obtained from round 2, 19 sequences were obtained from round 3, and 6 sequences were obtained from round 4. Primer regions are in bold.

Table S 1. Aptamer sequences from round 1 through 4

| Clone | Sequence (5'→3')                                                                   |
|-------|------------------------------------------------------------------------------------|
| 1.1   | AGCAGCACAGAGGTCAGATGTTATCAACGCGTCTGTCCTATAAACTCATGTAATAATCCTATGCGTGCTACCGTGAA      |
| 1.2   | AGCAGCACAGAGGTCAGATGCCTGTGTCATTATATGCTAAGGAAATTCATTACGTTCTCCTATGCGTGCTACCGTGAA     |
| 1.3   | AGCAGCACAGAGGTCAGATGGGACTAACTCATGATTCAGTACGATAGATCCTACCATTTCCCTATGCGTGCTACCGTGAA   |
| 1.4   | AGCAGCACAGAGGTCAGATGATCATAGTCTGCTTGCTTGTATTATTTGAGCGGTCCATCCCTATGCGTGCTACCGTGAA    |
| 1.5   | AGCAGCACAGAGGTCAGATGGCTATAACTCAGATTACAATATTTGAATTGGTCCCAATCCTATGCGTGCTACCGTGAA     |
| 1.6   | AGCAGCACAGAGGTCAGATGTAGCAAGAGTACTGAGTAAATCTACAATTTAGCCATTAACCTATGCGTGCTACCGTGAA    |
| 1.7   | AGCAGCACAGAGGTCAGATGATCCAAAGTCCATCTAAAGCGATTATAGGGTACTTCCCTATGCGTGCTACCGTGAA       |
| 1.8   | AGCAGCACAGAGGTCAGATGGGCGCGTTTTCTGGTTCTGGATCGGCTCCACGGCTGCTATGCGTGCTACCGTGAA        |
| 1.9   | AGCAGCACAGAGGTCAGATGTTGAACGAAACACTAATTAATGTTTTCTCGTTAAGCGACCTATGCGTGCTACCGTGAA     |
| 1.10  | AGCAGCACAGAGGTCAGATGACCTGACCTTTTATCTCTCAGCTATAATTTGCTTTGTTCCCTATGCGTGCTACCGTGAA    |
| 1.11  | AGCAGCACAGAGGTCAGATGTTAACAACCTCGCATTAAAGACTATAGCATCGGCTGTACCTATGCGTGCTACCGTGAA     |
| 1.12  | AGCAGCACAGAGGTCAGATGAATTTCTATCGTCAGTTTATGAATCGGGAGGAAGCGCGCCCTATGCGTGCTACCGTGAA    |
| 1.13  | AGCAGCACAGAGGTCAGATGACTTAGTTCAGAATATGAGTACTATGGTATAAGGTCGATCCCTATGCGTGCTACCGTGAA   |
| 1.14  | AGCAGCACAGAGGTCAGATGGATCATCTTTTAAAGACGGAGCTTATATTATTAGAACTTCCCTATGCGTGCTACCGTGAA   |
| 1.15  | AGCAGCACAGAGGTCAGATGGCGCATTATCTAGGCGCTGGGAGGCTCTATTAAGGCCGGCCTATGCGTGCTACCGTGAA    |
| 1.16  | AGCAGCACAGAGGTCAGATGGCTTGGTTTTAGTTATCAAAAGATCGTGTAGCCACATTTCCCTATGCGTGCTACCGTGAA   |
| 1.17  | AGCAGCACAGAGGTCAGATGACAGTAAGTGTACTAGAATAGCGTGCTCAAACCGTTAGAGCCTATGCGTGCTACCGTGAA   |
| 1.18  | AGCAGCACAGAGGTCAGATGGAGGGTATTAAGCTATAAATTATTGCGGGAACCCGTTATCCTATGCGTGCTACCGTGAA    |
| 1.19  | AGCAGCACAGAGGTCAGATGCCAGCACAGTCTTGTCTATTAGAGGTATTATTGTGGTTCCCTATGCGTGCTACCGTGAA    |
| 1.20  | AGCAGCACAGAGGTCAGATGCTAGATATTATTGGCATGAAGACTCTACTGAAGGGACATGCCTATGCGTGCTACCGTGAA   |
| 1.21  | AGCAGCACAGAGGTCAGATGCGAGTTTTAATATAAAGCTACAATTATTGAGCACGTTGAACCTATGCGTGCTACCGTGAA   |
| 1.22  | AGCAGCACAGAGGTCAGATGTGGAGGGTGTGTCTAAGTTCGCGGTGTGTGATGTGGACTACCTATGCGTGCTACCGTGAA   |
| 1.23  | AGCAGCACAGAGGTCAGATGCTTACCTCCCTCACGATAACCCGGAAGTAGTCGACTAACCCCTATGCGTGCTACCGTGAA   |
| 2.1   | AGCAGCACAGAGGTCAGATGCCAGCGTTAGAGACTCCGACCTGGTGACATGTATCACAACCTATGCGTGCTACCGTGAA    |
| 2.2   | AGCAGCACAGAGGTCAGATGAGTTGCCAGCTTATCCGGACAATAATAGTGGCGGTTTCCCTATGCGTGCTACCGTGAA     |
| 2.3   | AGCAGCACAGAGGTCAGATGTCACATGCATAAATATACAGTCCTTTTTGTGCTAACACCTATGCGTGCTACCGTGAA      |
| 2.4   | AGCAGCACAGAGGTCAGATGTGCTCCAAATTTCAAGCTGTTGCATCTAGGCTAAAGTGCATCCTATGCGTGCTACCGTGAA  |
| 2.5   | AGCAGCACAGAGGTCAGATGCAGGGCAATGTTATGTGTTAGGAAAAATTAAGCACTGCCTATGCGTGCTACCGTGAA      |
| 2.6   | AGCAGCACAGAGGTCAGATGAGGGGTTAGATATGAAACGTTTGTAGTTGGGGGTCCGAAAAACCTATGCGTGCTACCGTGAA |
| 2.7   | AGCAGCACAGAGGTCAGATGATCAACGTAAGCTTTTCTCCATTATTAAGTAGTCTAAAGCCTATGCGTGCTACCGTGAA    |
| 2.8   | AGCAGCACAGAGGTCAGATGAGCACATGGGATCAGTCTCTCTGTATGCGCATAGAGGTCCTATGCGTGCTACCGTGAA     |
| 2.9   | AGCAGCACAGAGGTCAGATGTCGGGTATCCTATAACATTAAGGCTAACTCATTAGTTTACCTATGCGTGCTACCGTGAA    |
| 2.10  | AGCAGCACAGAGGTCAGATGCATTTCCGTAGCACTCTCTAATAGGGTAAAGATTTAGCCTATGCGTGCTACCGTGAA      |
| 2.11  | AGCAGCACAGAGGTCAGATGCTTAAAAACGTTCAACCTGCGTGCTTATTTCACTACTGCCTATGCGTGCTACCGTGAA     |
| 2.12  | AGCAGCACAGAGGTCAGATGGAATACCGTACGGTGCTCGGTAGTGGTGGTCCCGGTTAGACCTATGCGTGCTACCGTGAA   |
| 2.13  | AGCAGCACAGAGGTCAGATGCTCCCGCATACAAAAAATTTATTAGTCATTATTTCCGACCTATGCGTGCTACCGTGAA     |

|      |                                                                                   |
|------|-----------------------------------------------------------------------------------|
| 2.14 | AGCAGCACAGAGGTCAGATGCTTCGGGCTATGTCATAGAAGTATAGGTAGGTGTTTAAGCCTATGCGTGCTACCGTGAA   |
| 2.15 | AGCAGCACAGAGGTCAGATGACGTTCCGGAAATTCAGAGTGATACGCTGTTTTAATACCTATGCGTGCTACCGTGAA     |
| 2.16 | AGCAGCACAGAGGTCAGATGGCTTTGGGGATGAATCTCATGATATTATGTTCTCACCCCTATGCGTGCTACCGTGAA     |
| 2.17 | AGCAGCACAGAGGTCAGATGAGGCTTAACAGTATCGCCAGTCATATAGCCAATCACAGCCTATGCGTGCTACCGTGAA    |
| 2.18 | AGCAGCACAGAGGTCAGATGCAAGTCTCGACGATAATTTAGGCTATAATAGTCCTACACACCTATGCGTGCTACCGTGAA  |
| 2.19 | AGCAGCACAGAGGTCAGATGCATTAGGTTGCGGCGGACTTTGATGGTTGCTGGGGCGGCCATGCGTGCTACCGTGAA     |
| 2.20 | AGCAGCACAGAGGTCAGATGTTGAGACTGCTGTGCTGGGGTCCGTTGAGATAGTAGGGGGCCTATGCGTGCTACCGTGAA  |
| 2.21 | AGCAGCACAGAGGTCAGATGGTCAAAAGCTTATTCGTTGAGTAAGTGCGATCAACGACCACCTATGCGTGCTACCGTGAA  |
| 2.22 | AGCAGCACAGAGGTCAGATGTTCCATATAGCGACCATGCTGTGAGGTCCGCATCTATACCTATGCGTGCTACCGTGAA    |
| 2.23 | AGCAGCACAGAGGTCAGATGAAGCATTGATCCTAGCGTTAGGCTATGGCTTTTACTTAAACCTATGCGTGCTACCGTGAA  |
| 2.24 | AGCAGCACAGAGGTCAGATGCTCCCGCATACAAAAATAATTTATTAGTCATTATTCGCACCTATGCGTGCTACCGTGAA   |
| 2.25 | AGCAGCACAGAGGTCAGATGGTAGCTTGCGTGTAAATAAATCACAGACTGGTGATCCCTATGCGTGCTACCGTGAA      |
| 2.26 | AGCAGCACAGAGGTCAGATGTGCGTGTGCTATTAAGTGACTCCTAGGGGCTAACTAGTGCTATGCGTGCTACCGTGAA    |
| 2.27 | AGCAGCACAGAGGTCAGATGGTCAAAAGGGCGCTTGTGGCGGGGTAATTCTCTACGATCCTATGCGTGCTACCGTGAA    |
| 2.28 | AGCAGCACAGAGGTCAGATGGATTAGTATCCGAGCAGTATGAAGTAACTTGGTGCGTGCTACCGTGAA              |
| 3.1  | AGCAGCACAGAGGTCAGATGTATACCAGTTTTATGGCTTTCATTCTCATAATGGGCCTATGCGTGCTACCGTGAA       |
| 3.2  | AGCAGCACAGAGGTCAGATGTAAGTATAGTATATACGCGTATGAAGTTCGTTAATAGCCTATGCGTGCTACCGTGAA     |
| 3.3  | AGCAGCACAGAGGTCAGATGAGGCGGATATGGTTTCTCTTCGAGGTGGTTTTCCAGGTCCTATGCGTGCTACCGTGAA    |
| 3.4  | AGCAGCACAGAGGTCAGATGGGCTGAGTTTACATTTATAGTAGTAATGAACTTCAAACCTATGCGTGCTACCGTGAA     |
| 3.5  | AGCAGCACAGAGGTCAGATGTATAGTATTTTCAATGTTTCTAGGTACAGTGTGGTATAACCTATGCGTGCTACCGTGAA   |
| 3.6  | AGCAGCACAGAGGTCAGATGTATGCAATGTTCTCAGTCGTGAAAACCTTGCTTATGTTCCCTATGCGTGCTACCGTGAA   |
| 3.7  | AGCAGCACAGAGGTCAGATGAATGAGTACAGATTTGGTCTAAGCTTCTATTTAAAGACCTATGCGTGCTACCGTGAA     |
| 3.8  | AGCAGCACAGAGGTCAGATGTTTAGGTCGCTCAGTACAGGCCATCTATTGTCTGAGATCCTATGCGTGCTACCGTGAA    |
| 3.9  | AGCAGCACAGAGGTCAGATGAAGTTAAAGAATGGGCGTTTTGTGTAATCAATAAGTCAACCTATGCGTGCTACCGTGAA   |
| 3.10 | AGCAGCACAGAGGTCAGATGGTCAGAGGGGTAGCTTGTGGTGGGTGCGGGGGGCGAGTCCTATGCGTGCTACCGTGAA    |
| 3.11 | AGCAGCACAGAGGTCAGATGTACTTATTTAGCCCTGTTCTCATTCTGCTTAGCGAACAACCTATGCGTGCTACCGTGAA   |
| 3.12 | AGCAGCACAGAGGTCAGATGTGATTGTTAACCGGCTTGTGTGGTCCATATTCATCTCCCCTATGCGTGCTACCGTGAA    |
| 3.13 | AGCAGCACAGAGGTCAGATGCATATAGTCTGCAAGTGGGAACTGGTTATAGACCTCACCCCTATGCGTGCTACCGTGAA   |
| 3.14 | AGCAGCACAGAGGTCAGATGTATAGTATTTTCAATGTTTCTAGGTACAGTGTGGTATAACCTATGCGTGCTACCGTGAA   |
| 3.15 | AGCAGCACAGAGGTCAGATGTCGCAGCTCGGTTGATCAGTGGCGGGGCTCCCCTTTGTCTATGCGTGCTACCGTGAA     |
| 3.16 | AGCAGCACAGAGGTCAGATGTTGATGTTCTCCGTTCTGCCGTTTAACTCAGTTTAGGCACCCCTATGCGTGCTACCGTGAA |
| 3.17 | AGCAGCACAGAGGTCAGATGATACTCCAAAATCTATGAAAACGATGCGAACCACCTACTTCTATGCGTGCTACCGTGAA   |
| 3.18 | AGCAGCACAGAGGTCAGATGTATATATCGATACATTTTTACTGCAGCCTACCAAACGTCCTATGCGTGCTACCGTGAA    |
| 3.19 | AGCAGCACAGAGGTCAGATGGAACGCTCCGCATGTTAGCGTCTTAAGCTGCGTCTACTCCCTATGCGTGCTACCGTGAA   |
| 4.1  | AGCAGCACAGAGGTCAGATGTTCTAGAAGTGCACTTTATAAGTATCGGTTAAGTAACTTCTATGCGTGCTACCGTGAA    |
| 4.2  | AGCAGCACAGAGGTCAGATGATTCTGGGGAGTGGTACCTACCAGTGCCACCCCGTTATCCTATGCGTGCTACCGTGAA    |
| 4.3  | AGCAGCACAGAGGTCAGATGATGTTAGGTGTGAACCGTAGTAGGTAAGGTTGAAATCACGCCTATGCGTGCTACCGTGAA  |
| 4.4  | AGCAGCACAGAGGTCAGATGATTCTGGGGAGTGGTACGTAAGCAGTGCCACCACGGTTATCCTATGCGTGCTACCGTGAA  |
| 4.5  | AGCAGCACAGAGGTCAGATGATTCTGGGGAGTGGTACGTAAGCAGTGCCACCACGGTTATCCTATGCGTGCTACCGTGAA  |
| 4.6  | AGCAGCACAGAGGTCAGATGATTCTGGGGAGTGGTACGTAAGCAGTGCCACCACGGTTATCCTATGCGTGCTACCGTGAA  |
